# Supplementary material
Source: Springer Nature journal article supplement (https://www.springermedizin.de/resource/supplementary/12879_2011_1696_MOESM4_ESM.pdf/9443484)

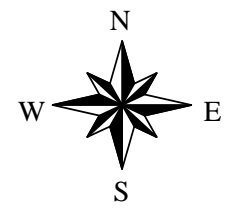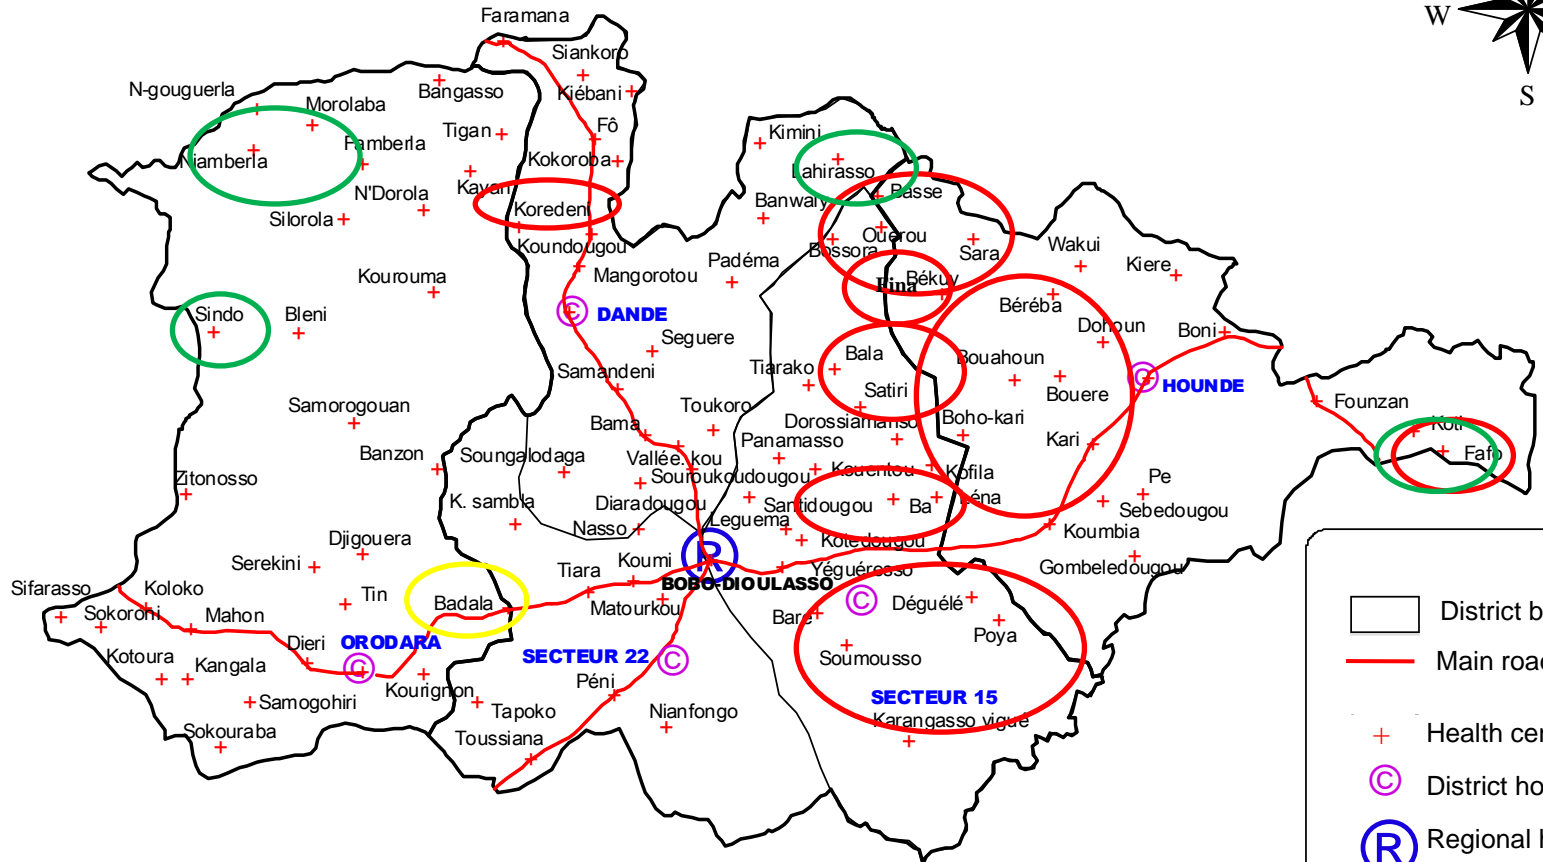

Legend:

- District borders
- Main roads
- + Health center
- ⊕ District hospital
- Ⓡ Regional hospital

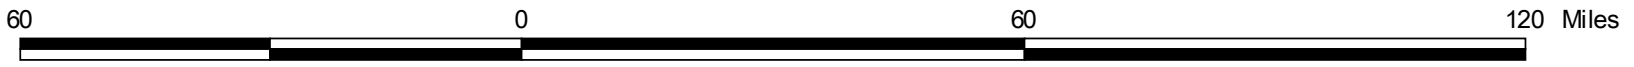

Supplement: MOESM4 [file 9443484]
